# Supplementary material
Source: PubMed Central journal article supplement (PMC8319073)
Supplement: NIHMS1692823-supplement-1.pdf [file NIHMS1692823-supplement-1.pdf]

## Appendix Text 1

To obtain a measure of additive effect modification, relative excess risk due to interaction (RERI) was estimated using the following formula:

$$RERI_{a,m} = RR_{am} - RR_{a_{Ref},m} - RR_{a,m_{Ref}} + 1$$

where  $RR_{am}$  is the RR of death for the stratum with baseline purpose  $A = a$  and SES category  $M = m$ ; further  $A = a_{Ref}, M = m_{Ref}$  represents the reference groups for baseline purpose and SES (i.e., the lowest purpose quartile and lowest SES category). SEs for RERIs were computed via the delta method.<sup>1</sup> To obtain a measure of multiplicative effect modification, the ratio of RRs (RRR) was estimated using the following formula.

$$RRR_{am} = RR_{am} / (RR_{a_{Ref},m} * RR_{a,m_{Ref}})$$

RERI and RRR can be interpreted as the extent to which the RR of death for the joint exposure to baseline purpose and SES together exceeds the RR predicted by each considered separately on either the additive (RERI) or multiplicative scale (RRR). Statistical significance for effect modification was assessed by testing the null hypotheses  $RERI = 0$  (for the additive scale) and  $RRR = 1$  (for the multiplicative scale).

## **Appendix Text 2**

Additional details about covariates and missing data are described below.

### **Covariates**

Although purpose in life and depression are correlated, adjusting for depression is important because from a conceptual point of view it could be a confounder in our main association of interest. Additionally, emerging evidence shows that dimensions of psychological well-being (including a sense of purpose in life) are associated with several physical health outcomes, above and beyond the mere absence of depression – thus purpose is an important factor to evaluate in its own right.

### **Missing Data**

This study conducted a sensitivity analysis where covariates as well as purpose in life were imputed and the results were essentially identical. Also, 185 (1.3%) of the study sample was excluded due to missing data on death. This is a small percentage of the population, thus unlikely to substantially alter the results.

**Appendix**  
**Associations Between Purpose in Life and Mortality by SES**  
**Shiba et al.**

**Appendix Table 1.** Modification of the Effect of Sense of Purpose in Life on Mortality (by Level of Education)<sup>a</sup>

| Level of education              | Sense of purpose in life |                                                                         |                             |                                                                         |                 |                                                                            |                    |                                        |
|---------------------------------|--------------------------|-------------------------------------------------------------------------|-----------------------------|-------------------------------------------------------------------------|-----------------|----------------------------------------------------------------------------|--------------------|----------------------------------------|
|                                 | Low                      |                                                                         | Medium–low                  |                                                                         | Medium–high     |                                                                            | High               |                                        |
|                                 | n, died/alive            | RR (95% CI)                                                             | n, died/alive               | RR (95% CI)                                                             | n, died/alive   | RR (95% CI)                                                                | n, died/alive      | RR (95% CI)                            |
| <High school                    |                          | 1.0                                                                     |                             | $\exp(\beta_1)$                                                         |                 | $\exp(\beta_2)$                                                            |                    | $\exp(\beta_3)$                        |
| High school                     |                          | $\exp(\beta_4)$                                                         |                             | $\exp(\beta_1 + \beta_4 + \beta_6)$                                     |                 | $\exp(\beta_2 + \beta_4 + \beta_8)$                                        |                    | $\exp(\beta_3 + \beta_4 + \beta_{10})$ |
| ≥College                        |                          | $\exp(\beta_5)$                                                         |                             | $\exp(\beta_1 + \beta_5 + \beta_7)$                                     |                 | $\exp(\beta_2 + \beta_5 + \beta_9)$                                        |                    | $\exp(\beta_3 + \beta_5 + \beta_{11})$ |
| Measures of effect modification |                          |                                                                         |                             |                                                                         |                 |                                                                            |                    |                                        |
|                                 | Low                      | Medium–low                                                              |                             | Medium–high                                                             |                 | High                                                                       |                    |                                        |
|                                 |                          | Additive <sup>b</sup>                                                   | Multiplicative <sup>c</sup> | Additive                                                                | Multiplicative  | Additive                                                                   | Multiplicative     |                                        |
| <High school                    | ref                      | ref                                                                     | ref                         | ref                                                                     | ref             | ref                                                                        | ref                |                                        |
| High school                     | ref                      | $\exp(\beta_1 + \beta_4 + \beta_6) - \exp(\beta_1) - \exp(\beta_4) + 1$ | $\exp(\beta_6)$             | $\exp(\beta_2 + \beta_4 + \beta_8) - \exp(\beta_2) - \exp(\beta_4) + 1$ | $\exp(\beta_8)$ | $\exp(\beta_3 + \beta_4 + \beta_{10}) - \exp(\beta_3) - \exp(\beta_4) + 1$ | $\exp(\beta_{10})$ |                                        |
| ≥College                        | ref                      | $\exp(\beta_1 + \beta_5 + \beta_7) - \exp(\beta_1) - \exp(\beta_5) + 1$ | $\exp(\beta_7)$             | $\exp(\beta_2 + \beta_5 + \beta_9) - \exp(\beta_2) - \exp(\beta_5) + 1$ | $\exp(\beta_9)$ | $\exp(\beta_3 + \beta_5 + \beta_{11}) - \exp(\beta_3) - \exp(\beta_5) + 1$ | $\exp(\beta_{11})$ |                                        |

Notes: RRs are adjusted for age, sex, race/ethnicity, marital status, household income, wealth, health insurance, heart disease, stroke, cancer, diabetes, hypertension, lung disease, arthritis, and depression using Poisson regression.

<sup>a</sup>Poisson regression model:  $\log E[\text{Death} | \text{Purpose}, \text{Education}, C] = \beta_0 + \beta_1 \text{Purpose}_{\text{Medium-low}} + \beta_2 \text{Purpose}_{\text{Medium-high}} + \beta_3 \text{Purpose}_{\text{High}} + \beta_4 \text{Education}_{\text{High School}} + \beta_5 \text{Education}_{\geq \text{College}} + \beta_6 \text{Education}_{\text{High School}} * \text{Purpose}_{\text{Medium-low}} + \beta_7 \text{Education}_{\geq \text{College}} * \text{Purpose}_{\text{Medium-low}} + \beta_8 \text{Education}_{\text{High School}} * \text{Purpose}_{\text{Medium-high}} + \beta_9 \text{Education}_{\geq \text{College}} * \text{Purpose}_{\text{Medium-high}}$

**Appendix**  
**Associations Between Purpose in Life and Mortality by SES**  
**Shiba et al.**

$Purpose_{Medium-high} + \beta_{10} Education_{High\ School} * Purpose_{High} + \beta_{11} Education_{\geq College} * Purpose_{High} + C\beta'$ , where C is a vector of covariates.

<sup>b</sup>Effect modification on additive scale: relative excess risk due to interaction (RERI; SEs were calculated by using the delta method).

<sup>c</sup>Effect modification on multiplicative scale: ratio of risk ratio (RRR).

RR, risk ratio.

**Appendix**  
**Associations Between Purpose in Life and Mortality by SES**  
**Shiba et al.**

**Appendix Table 2.** Characteristics of study participants at baseline, by levels of purpose in life (n=13,159)

| Characteristics                           | Sense of purpose in life <sup>a</sup> |                  |                             |                              |                   |
|-------------------------------------------|---------------------------------------|------------------|-----------------------------|------------------------------|-------------------|
|                                           | Total<br>(n=13159)                    | Low<br>(n=3,445) | Medium<br>-low<br>(n=3,167) | Medium-<br>high<br>(n=3,465) | High<br>(n=3,082) |
| Death by the end of follow-up             | 3,253<br>(24.7)                       | 1,259<br>(36.5)  | 801<br>(25.3)               | 724 (20.9)                   | 469 (15.2)        |
| Socioeconomic status                      |                                       |                  |                             |                              |                   |
| Education                                 |                                       |                  |                             |                              |                   |
| <High school (%)                          | 2,515<br>(19.1)                       | 1,012<br>(29.4)  | 616<br>(19.5)               | 504 (14.5)                   | 383 (12.4)        |
| High school (%)                           | 7,223<br>(54.9)                       | 1,863<br>(54.1)  | 1,806<br>(57.0)             | 1,928<br>(55.6)              | 1,626<br>(52.8)   |
| ≥College (%)                              | 3,395<br>(25.8)                       | 568 (16.5)       | 741<br>(23.4)               | 1,022<br>(29.5)              | 1,064<br>(34.5)   |
| Household income quartiles <sup>b,c</sup> |                                       |                  |                             |                              |                   |
| Q1 (%)                                    | 3,221<br>(24.5%)                      | 1,257<br>(36.5%) | 766<br>(24.2%)              | 680<br>(19.6%)               | 518<br>(16.8%)    |
| Q2 (%)                                    | 3,303<br>(25.1%)                      | 944<br>(27.4%)   | 879<br>(27.8%)              | 814<br>(23.5%)               | 666<br>(21.6%)    |
| Q3 (%)                                    | 3,312<br>(25.2%)                      | 753<br>(21.9%)   | 813<br>(25.7%)              | 957<br>(27.6%)               | 789<br>(25.6%)    |
| Q4 (%)                                    | 3,323<br>(25.3%)                      | 491<br>(14.3%)   | 709<br>(22.4%)              | 1,014<br>(29.3%)             | 1,109<br>(36.0%)  |
| Wealth quintiles <sup>b,d</sup>           |                                       |                  |                             |                              |                   |
| Q1 (%)                                    | 2,598<br>(19.7)                       | 969 (28.1)       | 651<br>(20.6)               | 569 (16.4)                   | 409 (13.3)        |
| Q2 (%)                                    | 2,616<br>(19.9)                       | 810 (23.5)       | 659<br>(20.8)               | 630 (18.2)                   | 517 (16.8)        |
| Q3 (%)                                    | 2,642<br>(20.1)                       | 673 (19.5)       | 623<br>(19.7)               | 705 (20.3)                   | 641 (20.8)        |
| Q4 (%)                                    | 2,656<br>(20.2)                       | 524 (15.3)       | 651<br>(20.6)               | 768 (22.2)                   | 713 (23.1)        |
| Q5 (%)                                    | 2,657<br>(20.1)                       | 469 (13.6)       | 583<br>(18.4)               | 793 (22.9)                   | 802 (26.0)        |
| Other demographic characteristics         |                                       |                  |                             |                              |                   |
| Mean age (SD)                             | 69.6 (9.58)                           | 71.6 (10.3)      | 70.0<br>(9.74)              | 68.9 (9.11)                  | 67.9 (8.60)       |
| Gender                                    |                                       |                  |                             |                              |                   |
| Men (%)                                   | 5,495<br>(41.8)                       | 1,420<br>(41.2)  | 1,337<br>(42.2)             | 1,466<br>(42.3)              | 1,272<br>(41.3)   |

**Appendix**  
**Associations Between Purpose in Life and Mortality by SES**  
**Shiba et al.**

|                         |                  |                 |                 |                 |                 |
|-------------------------|------------------|-----------------|-----------------|-----------------|-----------------|
| Women (%)               | 7,664<br>(58.2)  | 2,025<br>(58.8) | 1,830<br>(57.8) | 1,999<br>(57.7) | 1,810<br>(58.7) |
| <b>Race/ethnicity</b>   |                  |                 |                 |                 |                 |
| White (%)               | 10,240<br>(77.8) | 2,615<br>(75.9) | 2,515<br>(79.4) | 2,758<br>(79.6) | 2,352<br>(76.3) |
| Black (%)               | 1,645<br>(12.5)  | 376 (10.9)      | 365<br>(11.5)   | 423 (12.2)      | 481 (15.6)      |
| Hispanic (%)            | 1,002<br>(7.6)   | 371 (10.8)      | 220 (6.9)       | 219 (6.3)       | 192 (6.2)       |
| Other (%)               | 271 (2.1)        | 83 (2.4)        | 67 (2.1)        | 64 (1.8)        | 57 (1.8)        |
| <b>Marital status</b>   |                  |                 |                 |                 |                 |
| Not married (%)         | 4,885<br>(37.1)  | 1,566<br>(45.5) | 1,232<br>(38.9) | 1,135<br>(32.8) | 952 (30.9)      |
| Married (%)             | 8,274<br>(62.9)  | 1,879<br>(54.5) | 1,935<br>(61.1) | 2,330<br>(67.2) | 2,130<br>(69.1) |
| <b>Health insurance</b> |                  |                 |                 |                 |                 |
| Not covered (%)         | 1,432<br>(10.9)  | 332 (9.6)       | 324<br>(10.2)   | 389 (11.2)      | 387 (12.6)      |
| Covered (%)             | 11,651<br>(88.5) | 3,083<br>(89.5) | 2,826<br>(89.2) | 3,055<br>(88.2) | 2,687<br>(87.2) |
| <b>Health factors</b>   |                  |                 |                 |                 |                 |
| <b>Heart disease</b>    |                  |                 |                 |                 |                 |
| No (%)                  | 9,905<br>(75.3)  | 2,362<br>(68.6) | 2,416<br>(76.3) | 2,630<br>(75.9) | 2,497<br>(81.0) |
| Yes (%)                 | 3,240<br>(24.6)  | 1,081<br>(31.4) | 746<br>(23.6)   | 832 (24.0)      | 581 (18.9)      |
| <b>Stroke</b>           |                  |                 |                 |                 |                 |
| No (%)                  | 12,102<br>(92.0) | 3,035<br>(88.1) | 2,913<br>(92.0) | 3,229<br>(93.2) | 2,925<br>(94.9) |
| Yes (%)                 | 1,048 (8.0)      | 406 (11.8)      | 251 (7.9)       | 235 (6.8)       | 156 (5.1)       |
| <b>Cancer</b>           |                  |                 |                 |                 |                 |
| No (%)                  | 11,098<br>(84.3) | 2,838<br>(82.4) | 2,673<br>(84.4) | 2,942<br>(84.9) | 2,645<br>(85.8) |
| Yes (%)                 | 2,037<br>(15.5)  | 597 (17.3)      | 486<br>(15.3)   | 520 (15.0)      | 434 (14.1)      |
| <b>Diabetes</b>         |                  |                 |                 |                 |                 |
| No (%)                  | 10,537<br>(80.1) | 2,539<br>(73.7) | 2,534<br>(80.0) | 2,834<br>(81.8) | 2,630<br>(85.3) |
| Yes (%)                 | 2,609<br>(19.8)  | 903 (26.2)      | 626<br>(19.8)   | 630 (18.2)      | 450 (14.6)      |
| <b>Hypertension</b>     |                  |                 |                 |                 |                 |
| No (%)                  | 5,580<br>(42.4)  | 1,267<br>(36.8) | 1,310<br>(41.4) | 1,542<br>(44.5) | 1,461<br>(47.4) |
| Yes (%)                 | 7,565<br>(57.5)  | 2,172<br>(63.0) | 1,853<br>(58.5) | 1,919<br>(55.4) | 1,621<br>(52.6) |
| <b>Lung diseases</b>    |                  |                 |                 |                 |                 |

**Appendix**  
**Associations Between Purpose in Life and Mortality by SES**  
**Shiba et al.**

|                   |                  |                 |                 |                 |                 |
|-------------------|------------------|-----------------|-----------------|-----------------|-----------------|
| No (%)            | 11,851<br>(90.1) | 2,976<br>(86.4) | 2,817<br>(88.9) | 3,166<br>(91.4) | 2,892<br>(93.8) |
| Yes (%)           | 1,291 (9.8)      | 463 (13.4)      | 343<br>(10.8)   | 296 (8.5)       | 189 (6.1)       |
| <b>Arthritis</b>  |                  |                 |                 |                 |                 |
| No (%)            | 5,119<br>(38.9)  | 1,105<br>(32.1) | 1,230<br>(38.8) | 1,425<br>(41.1) | 1,359<br>(44.1) |
| Yes (%)           | 8,027<br>(61.0)  | 2,338<br>(67.9) | 1,934<br>(61.1) | 2,036<br>(58.8) | 1,719<br>(55.8) |
| <b>Depression</b> |                  |                 |                 |                 |                 |
| No (%)            | 11,180<br>(85.0) | 2,455<br>(71.3) | 2,694<br>(85.1) | 3,123<br>(90.1) | 2,908<br>(94.4) |
| Yes (%)           | 1,780<br>(13.5)  | 921 (26.7)      | 426<br>(13.5)   | 302 (8.7)       | 131 (4.3)       |

*Notes:* Boldface indicates statistical significance ( $p < 0.05$ ).

<sup>a</sup>Purpose in life was assessed using the purpose in life subscale of the Ryff Psychological Well-being Scales. Purpose in life quartiles: low: 1–3.86; medium–low: 4–4.57; medium–high: 4.6–5.29; high: 5.33–6.00.

<sup>b</sup>Income and wealth were imputed by Health and Retirement Study and, thus, there was no missing in these variables in the data used.

<sup>c</sup>Household income quartiles: 1st quartile:  $\leq$ \$20,024; 2nd quartile: \$20,025–\$38,321; 3rd quartile: \$38,322–\$71,895; 4th quartile:  $\geq$ \$71,896.

<sup>d</sup>Wealth quintiles: 1st quartile:  $\leq$ \$35,000; 2nd quartile: \$35,001–\$140,000; 3rd quartile: \$140,001–\$311,000; 4th quartile: \$311,001–\$652,500; 5th quartile:  $\geq$ \$652,501.

Q, quartile/quintile.

**Appendix**  
**Associations Between Purpose in Life and Mortality by SES**  
**Shiba et al.**

**Appendix Table 3.** RRs and CIs for Associations Between Baseline Purpose in Life and 8-Year Mortality Within Strata of Educational Attainment, Income Groups, and Wealth Quintiles<sup>a</sup>

| SES stratum                   | Sense of Purpose in Life <sup>b</sup> |        |     |            |      |        |             |        |      |        |      |        |
|-------------------------------|---------------------------------------|--------|-----|------------|------|--------|-------------|--------|------|--------|------|--------|
|                               | Low                                   |        |     | Medium–low |      |        | Medium–high |        |      | High   |      |        |
|                               | RR                                    | 95% CI | RR  | 95% CI     | RR   | 95% CI | RR          | 95% CI | RR   | 95% CI | RR   | 95% CI |
| Education                     |                                       |        |     |            |      |        |             |        |      |        |      |        |
| <High school                  | ref                                   | ref    | ref | 0.97       | 0.82 | 1.14   | 0.96        | 0.80   | 1.15 | 0.68   | 0.53 | 0.87   |
| High school                   | ref                                   | ref    | ref | 0.87       | 0.77 | 0.98   | 0.82        | 0.73   | 0.94 | 0.74   | 0.64 | 0.86   |
| ≥College                      | ref                                   | ref    | ref | 0.77       | 0.62 | 0.97   | 0.72        | 0.58   | 0.89 | 0.67   | 0.53 | 0.84   |
| Income quartiles <sup>c</sup> |                                       |        |     |            |      |        |             |        |      |        |      |        |
| Q1                            | ref                                   | ref    | ref | 0.91       | 0.79 | 1.06   | 0.91        | 0.78   | 1.06 | 0.76   | 0.62 | 0.92   |
| Q2                            | ref                                   | ref    | ref | 0.93       | 0.79 | 1.10   | 0.87        | 0.74   | 1.04 | 0.84   | 0.69 | 1.02   |
| Q3                            | ref                                   | ref    | ref | 0.79       | 0.65 | 0.96   | 0.78        | 0.64   | 0.95 | 0.60   | 0.47 | 0.75   |
| Q4                            | ref                                   | ref    | ref | 0.78       | 0.59 | 1.02   | 0.65        | 0.50   | 0.85 | 0.62   | 0.47 | 0.82   |
| Wealth quintiles <sup>d</sup> |                                       |        |     |            |      |        |             |        |      |        |      |        |
| Q1                            | ref                                   | ref    | ref | 0.93       | 0.78 | 1.10   | 1.00        | 0.83   | 1.20 | 0.81   | 0.64 | 1.03   |
| Q2                            | ref                                   | ref    | ref | 0.87       | 0.72 | 1.06   | 0.87        | 0.71   | 1.05 | 0.70   | 0.56 | 0.80   |
| Q3                            | ref                                   | ref    | ref | 0.91       | 0.74 | 1.11   | 0.86        | 0.70   | 1.06 | 0.71   | 0.56 | 0.91   |
| Q4                            | ref                                   | ref    | ref | 0.92       | 0.74 | 1.14   | 0.83        | 0.66   | 1.04 | 0.68   | 0.52 | 0.88   |
| Q5                            | ref                                   | ref    | ref | 0.71       | 0.56 | 0.91   | 0.58        | 0.45   | 0.74 | 0.66   | 0.52 | 0.85   |

<sup>a</sup>RRs were adjusted for age, gender, race/ethnicity, marital status, health insurance, heart disease, stroke, cancer, diabetes, hypertension, lung disease, arthritis, and depression using Poisson regression. Each model was further adjusted for the other 2 SES indicators (e.g., income and wealth for the education model).

<sup>b</sup>Purpose in life was assessed using the purpose in life subscale of the Ryff Psychological Well-being Scales. Purpose in life quartiles: low: 1.00–3.86; medium–low: 3.87–4.57; medium–high: 4.58–5.29; high: 5.30–6.00.

<sup>c</sup>Household income quartiles: 1st quartile: ≤\$20,024; 2nd quartile: \$20,025–\$38,321; 3rd quartile: \$38,322–\$71,895; 4th quartile: ≥\$71,896.

<sup>d</sup>Wealth quintiles: 1st quartile: ≤\$35,000; 2nd quartile: \$35,001–\$140,000; 3rd quartile: \$140,001–\$311,000; 4th quartile: \$311,001–\$652,500; 5th quartile: ≥\$652,501.

Q, quartile/quintile; RR, risk ratio.



**Appendix**  
**Associations Between Purpose in Life and Mortality by SES**  
**Shiba et al.**

**Appendix Table 4.** Measures of Effect Modification for Associations Between Continuous Purpose in Life and 8-Year Mortality by Continuous SES Indicators<sup>a</sup>

| Effect modifier | RRR <sup>b</sup> |              |                 |
|-----------------|------------------|--------------|-----------------|
|                 | Estimate         | (95% CI)     | <i>p</i> -value |
| Education       | 0.97             | (0.93, 1.02) | 0.26            |
| Income          | 0.96             | (0.94, 0.99) | 0.02            |
| Wealth          | 0.98             | (0.95, 1.00) | 0.04            |

<sup>a</sup>Purpose quartiles and SES indicators (3 levels for education, 4 levels for income, and 5 levels for wealth) were treated as continuous in this analysis. Poisson regression models adjusted for age, gender, race/ethnicity, marital status, health insurance, heart disease, stroke, cancer, diabetes, hypertension, lung disease, arthritis, and depression. Each model was further adjusted for the other two SES indicators (e.g., income and wealth for the education model).

<sup>b</sup>Ratio of risk ratios (RRR): Effect modification on multiplicative scale.

**Appendix**  
**Associations Between Purpose in Life and Mortality by SES**  
**Shiba et al.**

**Appendix Figure 1.** Distribution of continuous purpose in life across levels of educational attainment, income quartiles, and wealth quintiles.<sup>a,b</sup>

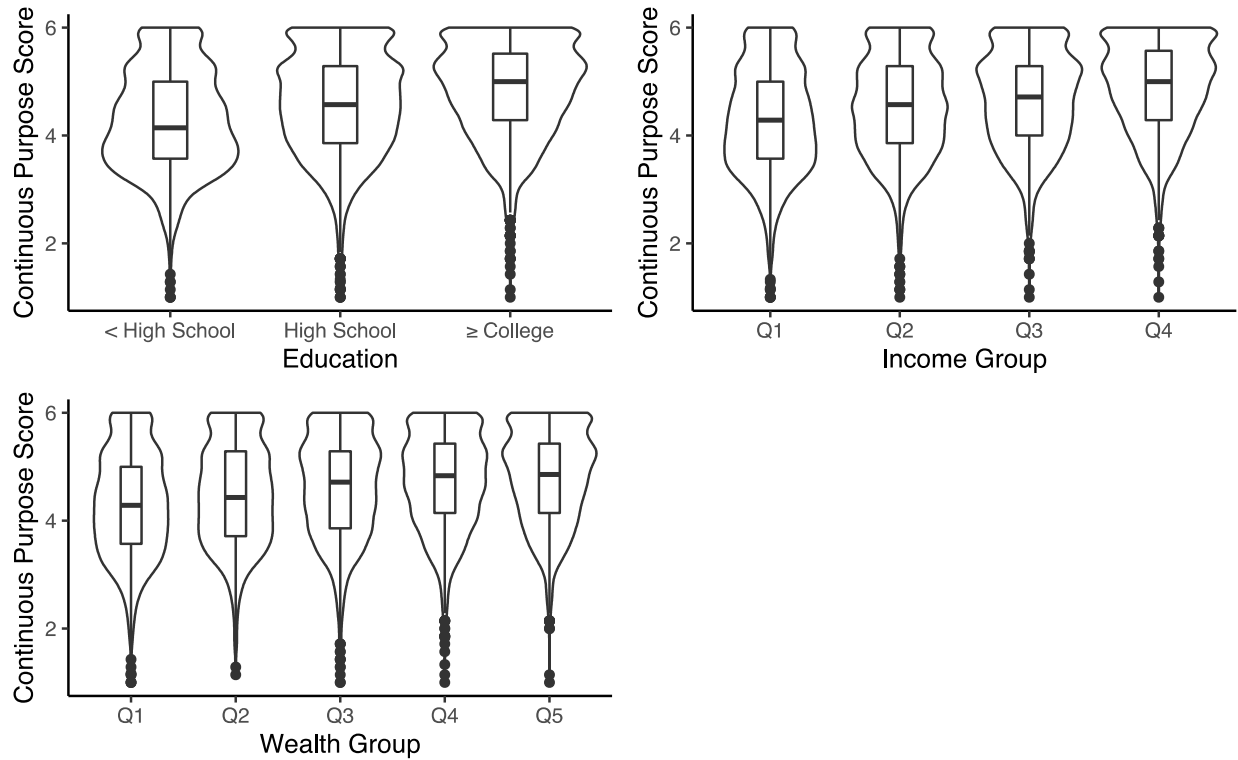

<sup>a</sup>Household income quartiles: 1st quartile:  $\leq$ \$20,024; 2nd quartile: \$20,025–\$38,321; 3rd quartile: \$38,322–\$71,895; 4th quartile:  $\geq$ \$71,896.

<sup>b</sup>Wealth quintiles: 1st quartile:  $\leq$ \$35,000; 2nd quartile: \$35,001–\$140,000; 3rd quartile: \$140,001–\$311,000; 4th quartile: \$311,001–\$652,500; 5th quartile:  $\geq$ \$652,501.

## Appendix References

1. Hosmer DW, Lemeshow S. Confidence interval estimation of interaction. *Epidemiology*. 1992;3(5):452–456. <https://doi.org/10.1097/00001648-199209000-00012>.
